# Supplementary material for: Improving Psychiatric Access for Students in Crisis: An Alternative to the Emergency Department
Source: Atypon-hosted journal article supplement (doi:10.1176/appi.ps.201900195), 2020-06-03
Supplement: appi.ps.201900195.ds001.pdf [file appi.ps.201900195.ds001.pdf]

## Table Supplement

Table 1. Characteristics of Patients Referred to Urgent Evaluation

|                              | Referrals<br>N=72 |     |
|------------------------------|-------------------|-----|
| <b>Gender</b>                |                   |     |
| Female                       | 42                | 58% |
| Male                         | 30                | 42% |
| <b>Grade level</b>           |                   |     |
| Elementary                   | 16                | 22% |
| Middle School                | 33                | 46% |
| High School                  | 23                | 32% |
| <b>Referral Reason</b>       |                   |     |
| Suicidal Ideation            | 26                | 36% |
| Self Harm                    | 18                | 25% |
| Homicidal ideation           | 4                 | 5%  |
| Disruptive Behavior          | 11                | 15% |
| Depression                   | 7                 | 10% |
| Anxiety                      | 2                 | 3%  |
| Psychosis                    | 2                 | 3%  |
| Other                        | 2                 | 3%  |
| <b>Assessment Status</b>     |                   |     |
| Completed                    | 70                | 97% |
| Not Completed                | 2                 | 3%  |
| <b>Outpatient Treatments</b> |                   |     |
| Yes                          | 15                | 21% |
| No                           | 55                | 79% |
| <b>Language</b>              |                   |     |
| English                      | 43                | 61% |
| Spanish                      | 16                | 23% |
| Chinese                      | 9                 | 13% |
| Other                        | 2                 | 3%  |
| <b>Primary Diagnosis</b>     |                   |     |
| Adjustment                   | 31                | 44% |
| Mood disorder                | 22                | 31% |
| Disruptive behavior disorder | 11                | 16% |
| Anxiety                      | 4                 | 6%  |
| Other                        | 2                 | 3%  |

II. ED school referral volume and admission rates by time of day (January through June)

|                 | All Shifts |        | Day Shift<br>(UES hours) |         | Evening/Weekend<br>(No UES) |        |
|-----------------|------------|--------|--------------------------|---------|-----------------------------|--------|
|                 | 2013       | 2014   | 2013                     | 2014    | 2013                        | 2014   |
| Referral Volume | 185        | 107    | 80                       | 45      | 105                         | 62     |
| Admit Rate      | 8 (4%)     | 7 (7%) | 3 (4%)                   | 5 (11%) | 5 (5%)                      | 2 (3%) |
